# *doublesex/mab3 related-1 (dmrt1)* is essential for development of anterior neural plate derivatives in *Ciona*

Jason Tresser<sup>1,\*</sup>, Shota Chiba<sup>1</sup>, Michael Veeman<sup>1</sup>, Danny El-Nachef<sup>1</sup>, Erin Newman-Smith<sup>1</sup>, Takeo Horie<sup>2,†</sup>, Motoyuki Tsuda<sup>2,‡</sup> and William C. Smith<sup>1,§</sup>

## SUMMARY

Ascidian larvae have a hollow, dorsal central nervous system that shares many morphological features with vertebrate nervous systems yet is composed of very few cells. We show here that a null mutation in the gene *dmrt1* in the ascidian *Ciona savignyi* results in profound abnormalities in the development of the sensory vesicle (brain), as well as other anterior ectodermal derivatives, including the palps and oral siphon primordium (OSP). Although the phenotype of the mutant embryos is variable, the majority have a complete loss of the most anterior structures (palps and OSP) and extensive disruption of sensory structures, such as the light-sensitive ocellus, in the sensory vesicle. *dmrt1* is expressed early in the blastula embryo in a small group of presumptive ectodermal cells as they become restricted to anterior neural, OSP and palp fates. Despite the early and restricted expression of *dmrt1*, we were unable, using several independent criteria, to observe a defect in the mutant embryos until the early tailbud stage. We speculate that the variability and late onset in the phenotype may be due to partially overlapping activities of other gene products.

**KEY WORDS:** Ascidian, Brain, Doublesex, Nervous system

## INTRODUCTION

The tunicate and vertebrate central nervous systems (CNS) share a similar but divergent anatomy and ontogeny, reflecting their common chordate ancestry. The tunicate CNS has been most extensively studied in embryonic and larval ascidians (Imai and Meinertzhagen, 2007a; Imai and Meinertzhagen, 2007b; Lemaire et al., 2002; Meinertzhagen et al., 2004). The adult tunicate CNS is less well characterized but is highly divergent from those of other adult chordates. The ascidian larval nervous system is notable for its anatomical and functional simplicity in comparison to those found in vertebrates, and contains a limited number of sensory systems and behavioral outputs. The simplicity of the ascidian nervous system is also reflected in the early lineage restriction of the various domains of the brain and rostral nerve cord (Lemaire et al., 2002).

We describe here a mutant line in the ascidian *Ciona savignyi* that disrupts the development of anterior neural plate derivatives. The genetic lesion responsible for this phenotype maps to a member of the *doublesex/mab-3-related (dmrt)* family of transcription factors. The *Drosophila doublesex* and the *Caenorhabditis elegans mab-3* genes share a common DNA-

binding motif known as the DM domain. These genes were originally characterized for their roles in sex determination in flies and worms. Subsequently, DM domain-containing genes have also been found in most vertebrate species, many of which are expressed in the gonads and play a role in sex determination. Several members of the vertebrate *dmrt* family are expressed outside the gonads and are involved in a wider range of developmental processes (Hong et al., 2007). The DM-containing gene *terra* is involved in somite formation and left-right asymmetry in both zebrafish and chickens (Meng et al., 1999; Raya and Izpisua Belmonte, 2006). In *Xenopus dmrt4* is expressed in the olfactory placodes and plays a role in the neurogenesis of the olfactory epithelium (Huang et al., 2005). *Dmrt3* in mouse may play a similar role (Hong et al., 2007).

In the ascidian, *dmrt1* is expressed in the anterior nervous system, which is derived from the anterior animal (a-Line) cells of the eight-cell-stage embryo. An FGF signal (presumably FGF 9/16/20) from vegetal blastomeres induces neural fate in the a-Line cells. FGF, along with *foxA-α*, activates several neural genes including *otx*, *nodal* and *dmrt1* (Hudson and Lemaire, 2001; Kim and Nishida, 2001; Imai et al., 2006). *Otx* plays a crucial role in maintaining anterior neural identity and suppressing epidermal fate (Wada and Saiga, 1999). Recently, knockdown experiments in ascidians have shown that *dmrt1*, along with *otx*, plays a role in promoting the expression of *six 1/2*, *six 3/6* and *meis* in the developing brain as well as promoting the expression of *foxC*, which promotes expression of palp-specific genes (Imai et al., 2006).

## MATERIALS AND METHODS

### *C. savignyi* genetics

Culturing of *C. savignyi*, mutagenesis, screening for recessive mutations, and amplified fragment length polymorphism (AFLP) linkage analysis were done as described previously (Hendrickson et al., 2004). Single nucleotide polymorphism (SNP) analysis was as described previously (Chiba et al., 2009).

<sup>1</sup>Department of Molecular, Cellular and Developmental Biology, University of California Santa Barbara, Santa Barbara, CA 93106, USA. <sup>2</sup>Department of Life Science, Graduate School of Life Science, University of Hyogo, Hyogo 678-1297, Japan.

\*Present address: Department of Biological Sciences, Biola University, La Mirada, CA 90639, USA

†Present address: Shimoda Marine Research Center, University of Tsukuba, Shimoda, Shizuoka, 415-0025, Japan

‡Present address: Kagawa School of Pharmaceutical Sciences, Tokushima Bunri University, 1314-1 Shido, Sanuki, Kagawa 769-2193, Japan

§Author for correspondence (w\_smith@lifesci.uscb.edu)

Primers covering the entire *C. savignyi dmrt1* gene were used to PCR amplify and sequence both wild-type and mutant genomic DNA. Primers 5'-CAAACTAAGTTACGATTTGAAC-3' (Dmrt Gup2) and 3'-GAACGACAACGCGTCATG-5' (Dmrt Gdn7) identified a premature stop codon in exon 1 of the mutant allele.

A 25-mer antisense morpholino oligonucleotide (MO) (Gene Tools) was designed for bases 15 to 39 bp upstream of the *C. savignyi dmrt1* presumptive start site: 5'-CTGTTTGTCTATAATTCTGTAAC-3' (dmrt-MO). Fertilized wild-type eggs were injected the dmrt-MO or control-MO, 5'-CCTCTTACCTCAGTTACAATTATA-3', as described (Yamada et al., 2003).

### RT-PCR

For the *dmrt1* developmental timecourse, total RNAs from each stage were extracted with Trizol (Invitrogen). One µg of total RNA was used for cDNA synthesis. Reverse transcription was done by SuperScript III first-strand synthesis system for RT-PCR (Invitrogen). Two µl of each first-strand cDNA were amplified 30 cycles, with the oligonucleotides 5'-GTCGCTCTTCGTCGCCAG-3' and 5'-GAGATTGGTGGGCTTGAG-3' for *dmrt1*, and 5'-AATGGATCCGGTATGTGC-3' and 3'-AGCTTC-TCTTTGATGTCACG-5' for cytoplasmic actin.

To assess *dmrt1* expression in ENU34 mutants, nested PCR was performed on total RNA from 40 wild-type or mutant mid-tailbud embryos using the oligonucleotides 5'-CAAGCGACAGAGGAGTTGAG-3' and 5'-TGCCTGGTCATTACACGAAG-3' for 20 cycles, then 5'-AGCTC-ATCCGCCACAGTAG-3' and 5'-AAGTCGGTGAACAATGGAC-3' for 25 cycles.

For *six-3*, *otx*, *foxC* RT-PCR in *dmrt1*-MO injected embryos (and control-MO injected; see above for sequences), total RNA was extracted from single early tailbud embryos or pools of four late gastrula embryos using Nucleospin XS RNA extraction kit (Clontech). RNA was reverse transcribed using SuperScript III first-strand synthesis system for RT-PCR (Invitrogen). Four microliters of each first-strand cDNA were amplified using one round of PCR and the oligonucleotides listed above for Actin. Nested PCR was performed for *six-3* using the oligonucleotides 5'-CTAGCTGCCCTGTCTCTTTGTC-3' and 5'-TGGCTGAAGCTCAC-TACCA-3', then 5'-CGTGGGCTAATTCCTTCTTT-3' and 5'-CATTG-CGGCCAGTTGATAAG-3' for 35 cycles, for *OTX* using the oligonucleotides 5'-GCCGGTGTGTAGGAGTAG-3' and 5'-TTCATG-AGGGAGGAAGTTGC-3' followed by 5'-TTCCGGAGCTACTTCC-ACTG-3' and 5'-CTGCCAGAATCCAGAGTTCA-3' for 25 cycles, and for *FoxC* using the oligonucleotides 5'-TTTGGTTGGATGTG-TGCTGT-3' and 5'-CGCAATGGCAATACAAAATG-3' followed by 5'-GGAAGTCCCCTTCATCAAT-3' and 5'-AGCTACCTTCGAGACGAAA-3' for 30 cycles.

### Immunostaining

Eggs from a *dmrt1*<sup>+/−</sup> adult were crossed to a line carrying a stably integrated transgene composed of the regulatory region of the *C. savignyi Etr1* gene fused to the cDNA for *Venus* fluorescent protein (Veeman et al., 2010). *Venus* protein was visualized by immunostaining, and actin with Bodipy-FL phalloidin, as described previously (Veeman et al., 2008). Nuclei were stained with Draq5 and counted. Immunostaining for arrestin, cellular retinaldehyde-binding protein, opsin and synaptotagmin was as described previously (Tsuda et al., 2003; Sakurai et al., 2004; Takimoto et al., 2006).

### In situ hybridization

In situ hybridization was done as described (Satou et al., 1995). For *dmrt1*, a ~400 bp fragment that was PCR amplified with the oligonucleotides 5'-TTAAATACAGCGGGGATTGG-3' and 5'-CATGACGCGTTGTCGTT-3' was used for probe synthesis, whereas for *islet* a ~650 bp fragment that was PCR amplified with the oligonucleotides 5'-GCGGACGACACGATGGGAT-3' and 5'-CAGGTGGACACGACGCTCAT-3' was used.

## RESULTS

### An anterior neural mutant maps to the *doublesex/mab3-related-1* gene

In screening ENU-mutagenized F1 *C. savignyi* (Moody et al., 1999) one line, ENU34, was selected for further study because of an obvious disruption in the development of the palps and the pigmented cells of the sensory vesicle (Fig. 1A). The allele responsible for the ENU34 phenotype behaved as a recessive mutation, and gave the expected 25% mutant progeny in crosses between heterozygous adults. While the mutant larvae were readily distinguishable from their wild-type siblings, there was some variation in the severity of the phenotype affecting the palps, pigmented cells and oral siphon primordium (OSP) (Table 1). The OSP, also called the stomodeum, is a dorsal ectodermal derivative arising between the palps and brain (Satoh 1994; Manni et al., 2005). Despite the defects, the mutant larvae hatched at the same time as their wild-type siblings, and displayed no readily observable defects outside of the palps and brain.

In order to find the genetic lesion responsible for the ENU34 phenotype, bulked segregated analysis was first used to identify amplified fragment length polymorphism (AFLP) markers linked to the mutant locus. Four linked markers (A1 to A4 in Fig. 1B) were located on a 3.6 Mb scaffold (Reftig 48) on Linkage Group 5 (Hill et al., 2008). Within Reftig 48 a region containing three clustered AFLP markers (A2 to A4) was further investigated by single nucleotide polymorphism (SNP) analysis, as we have described previously (Chiba et al., 2009). Mutant larvae from a self-fertilized heterozygous adult were collected into pools of five. Intronic DNA was amplified by PCR from the pools and sequenced to identify SNPs. DNA from phenotypically wild-type tadpoles (which would include heterozygous larvae) was also sequenced to identify SNPs. Three particularly informative SNPs (S1, S2 and S3) are shown in Fig. 1B,C. Both S1 and S3 showed weak linkage. For S1, recombination was observed in six pools of eleven tested; for S3, four of ten pools showed recombination. No recombination was observed in ten pools of five mutant tadpoles at S2. The SNP results thus define a 500 Kb region bounded by S1 and S3 that contains the genetic lesion responsible for the mutant phenotype. A candidate-gene approach was then used to identify the mutant gene.

The 500 Kb genomic region bounded by S1 and S3 is predicted to have 33 genes (<http://www.ensembl.org>). One gene near the center of this region, *doublesex/mab3-related-1* (*dmrt1*), appeared to be a particularly strong candidate (Fig. 1C). *Dmrt* genes have been shown to be involved in neural induction and patterning in several chordates, including in *C. intestinalis* (Huang et al., 2005; Imai et al., 2006). When assayed by RT-PCR, we observed no detectable *dmrt1* transcript in RNA samples from homozygous ENU34 tailbud embryos, whereas expression was observed in wild-type siblings (Fig. 1D). This observation is consistent with other mutants we have studied in *Ciona*, in which the expression of mutant genes are downregulated, presumably by a nonsense-mediated decay mechanism (Chiba et al., 2009; Jiang et al., 2005a; Jiang et al., 2005b; Veeman et al., 2008). An antisense MO was designed to block translation of *C. savignyi dmrt1* transcript. Wild-type embryos injected with the *dmrt1*-MO appeared identical to homozygous ENU34 embryos at the larval stage (38 of 41 injected), whereas all embryos injected with a control MO developed normally (*n*=45) (representative larvae shown in Fig. 1E).

The *C. savignyi dmrt1* gene is composed of six predicted exons that encode a 569 amino acid protein with two *doublesex/mab3*-related domains in exon 1 and exon 3, respectively (DM and DMA

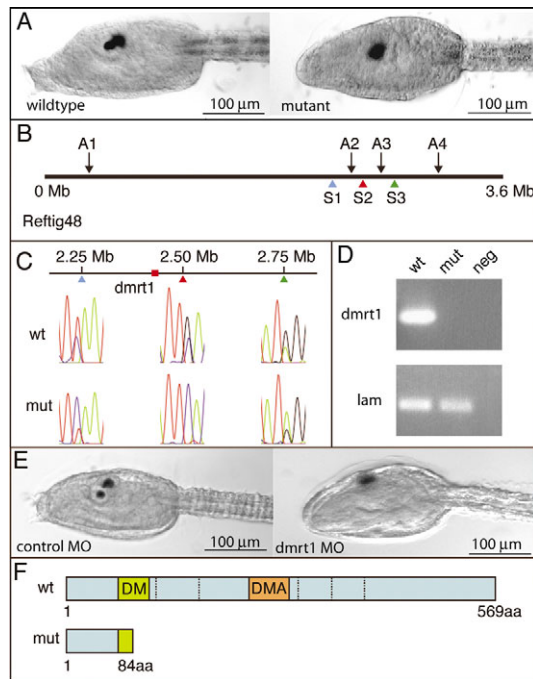

**Fig. 1. Anterior neural mutant maps to *dmrt1* gene.** (A) Trunk region of wild-type and homozygous ENU34 mutant at larval stage. (B) Diagram of Refig 48 showing linked AFLP (A1-A4) and SNP (S1-S3) markers. (C) Linkage analysis with SNP markers S1, S2 and S3. Representative traces are shown. (D) RT-PCR for *dmrt1* and *laminin*  $\alpha 3/4/5$  (lam; used as a loading control) in wild-type and homozygous ENU34 mutants. (E) A translation-blocking MO to *dmrt1* phenocopies the ENU34 mutant (compare right embryo in E with right embryo in A). (F) Diagram of the predicted wild-type and ENU34 mutant *C. savignyi* Dmrt1 protein.

in Fig. 1F). Sequencing of genomic DNA from homozygous ENU34 larvae identified a G to A transition in the DM domain of exon 1 that would result in an early termination codon (TGG to TAG). The resulting predicted 84 amino acid protein from this transcript would lack both the DNA-binding DM domain and the DMA domain (Fig. 1F).

The expression of *dmrt1* in the congeneric species *C. intestinalis* has been characterized previously by in situ hybridization (Imai et al., 2004). We found the early expression of *C. savignyi dmrt1* to be indistinguishable from its ortholog in *C. intestinalis*. Expression was first observed at the 64-cell stage in the a7.9, a7.10 and a7.13 blastomere pairs (Fig. 2A). The a7.9 blastomeres are lineage-restricted by this stage to give rise to anterior brain and palps,

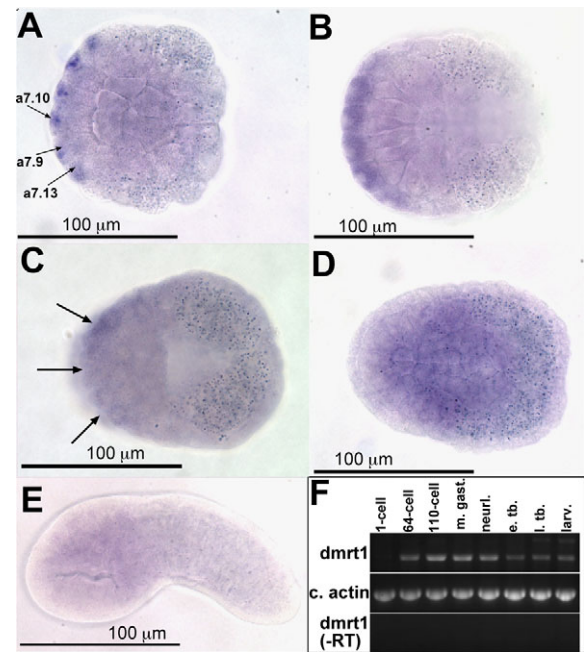

**Fig. 2. Expression of *dmrt1*.** (A-E) *Ciona savignyi dmrt1* in situ hybridization at 64-cell (A), 110-cell (B), mid-gastrula (C), neurula (D) and early tailbud (E) stages. Arrows in A indicate blastomeres with specific expression. The bilateral paired cells (a7.10, a7.0 and a7.13) are not marked. Arrows in C indicate faint staining in anterior ectoderm. (F) Timecourse of *C. savignyi dmrt1* expression by RT-PCR at the indicated stages. e. tb., early tailbud; larv., larval stages; l. tb., late tailbud; m. gast., mid-gastrula; neur., neurula.

whereas the a7.10 blastomeres are restricted to the OSP, brain and palps (Nishida, 1987). One daughter of the a7.13 blastomere (the a8.25 blastomere) becomes restricted to give rise to pigment and sensory vesicle cells. As in *C. intestinalis*, *C. savignyi dmrt1* continues to be expressed in the brain, OSP and palp precursors at the 110-cell stage (Fig. 2B). Unlike in reports for *C. intestinalis*, faint staining was observed in the presumptive brain region of mid-gastrula [Hotta stage 12, Hotta et al. (Hotta et al., 2007)] *C. savignyi* embryos (arrows in Fig. 2C). Thus at the 64-, 110-cell and gastrula stages the expression pattern of *dmrt1* corresponds precisely to the cell lineages disrupted in ENU34 mutant. In neither our studies of *C. savignyi* nor the previous studies in *C. intestinalis* was specific staining detectable in neurula embryos (Fig. 2D). In *C. intestinalis* it was observed that *dmrt1* transcript, after declining to undetectable levels in gastrula and neurula stages, is then expressed in a small region of the brain at tailbud stage. We failed to detect similar expression in *C. savignyi* tailbud embryos (Hotta stage 20; Fig. 2E). To investigate this further we examined the timecourse of *dmrt1* expression by RT-PCR (Fig. 2F). By this assay, *dmrt1* expression in *C. savignyi* peaked at the 110-cell stage and persisted, but declined, through larval stages. Consistent with our in situ hybridization data, we did not observe a new peak of expression at the tailbud stage.

In summary, several lines of evidence, including genetic linkage, phenocopy with MOs and expression data, allow us to conclude that the defects observed in the ENU35 mutant can be attributed to the premature stop codon found in the *dmrt1* gene. Because of the

**Table 1. Phenotypic variation in mutant larvae**

| Phenotype | Palps     | OSP       | Pigment cells |
|-----------|-----------|-----------|---------------|
| Normal    | 0         | 3.3 (1)   | 10 (3)        |
| Moderate  | 16.7 (5)  | 23.3 (7)  | 13.3 (4)      |
| Severe    | 83.3 (25) | 73.3 (22) | 76.6 (23)     |

Phenotypes are presented as percentages. The numbers in parentheses correspond to the number of larvae with each phenotype. A total of 30 larvae were screened. For the palp phenotype, moderate was defined as the presence of one or two small/malformed palps. Severe was defined as a complete absence of palps. For the OSP, a moderate phenotype was defined as a small and malformed, but recognizable, primordia. Severe was defined as the absence of a detectable OSP. For the pigment cell phenotype, moderate was defined as the presence of two distinct, albeit small, pigment cells. Severe was defined as having a single, apparently fused, pigment spot.



severity of the truncation, as well as the absence of detectable transcript, we conclude that ENU34 has a null mutation in the *dmrt1* gene. In the remainder of this manuscript the ENU34 locus will be referred to as *dmrt1*.

### Timecourse of phenotypic onset

Our mutant line allowed us to examine in detail the spatial and temporal defects resulting from the complete loss of *dmrt1*. For this study we crossed the *dmrt1* mutant line with a line carrying a stably integrated transgene composed of the regulatory region of the early pan-neural gene *etr1* (Yagi and Makabe, 2001) driving expression of the fluorescent protein Venus (*etr1*-Venus) (Veeman et al., 2010). Expression of the transgene could be detected by antibody staining as early as the gastrula stage, whereas direct fluorescence of Venus could not be detected until the neurula stage. In examining the progeny of crossed heterozygous adults (*dmrt1*<sup>+/−</sup>), we were unable to distinguish wild-type and mutant progeny at the late gastrula stage (Hotta stage 12–13) (Fig. 3A). However, genotyping of single transgenic embryos for the diagnostic G to A transition demonstrated that the expected fraction of embryos were homozygous for the mutation. Thus the earliest aspects of neural induction, as indicated by *etr1*-Venus expression, appear to occur normally in the *dmrt1*<sup>−/−</sup> mutants. An identical result was found at neurula stage (Hotta stage 15–16; Fig. 3B). The neural plates of *dmrt1*<sup>−/−</sup> embryos were indistinguishable from those of their wild-type or heterozygous siblings (either *dmrt1*<sup>+/+</sup> or *dmrt1*<sup>+/−</sup>) both in overall morphogenesis and in *etr1*-Venus expression. At the neurula stage *etr1* is expressed throughout the neural plate, which contains both the presumptive CNS, as well as the precursors of other anterior ectoderm derivatives such as the OSP and palps (Yagi and Makabe, 2001). At this stage, the palp precursors ('p-p' in Fig. 3B) make a characteristic fan-shaped structure at the anterior end of the neural plate. An identical structure was observed in *dmrt1*<sup>−/−</sup> embryos, suggesting that early morphogenesis of the palp precursors in the mutant was proceeding normally.

At early tailbud stage, the *dmrt1*<sup>−/−</sup> embryos still could not be distinguished from sibling embryos by morphology. However, the *etr1*-Venus transgene expression pattern at this stage was consistently different in the *dmrt1*<sup>−/−</sup> embryos when compared with sibling embryos (Fig. 3C). For example, in the wild-type expression seen in the representative *dmrt1*<sup>+/−</sup> embryo, the precursors of the neurohypophysis and OSP (n/OSP in Fig. 3C) narrow and extend anteriorly, while the equivalent region of the *dmrt1*<sup>−/−</sup> embryos had a flat anterior boundary. We also observed by in situ hybridization that early tailbud *dmrt1*<sup>−/−</sup> embryos did not express the neurohypophysis/OSP marker *six3/6* (*n*=30; data not shown), in agreement with previous reports (Imai et al., 2006). The extent of the defects in anterior neural plate derivatives caused by loss of *dmrt1* is seen in confocal images of late-tailbud embryos immunostained for *etr1*-Venus and cytoskeletal actin. In the mid-sagittal section presented in Fig. 3D the OSP and one of the palps can be seen in the wild-type embryo. In the *dmrt1*<sup>−/−</sup> embryo the brain is severely shortened and is lacking the anterior protrusion making up the neurohypophysis that connects to the OSP, as well as the OSP itself (Fig. 3D). Venus protein could be detected in the anterior surface ectoderm of the *dmrt1*<sup>−/−</sup> tailbud embryos, indicating that the palp precursors are still present but have failed to differentiate (Fig. 3D). By the swimming larva stage (Fig. 3E) the trunk has extended and narrowed. The two *dmrt1*<sup>−/−</sup> larvae show the range of phenotypes observed, from having greatly diminished OSP and neurohypophysis (dashed arrow in middle larva, Fig. 3E), to having no detectable OSP and neurohypophysis

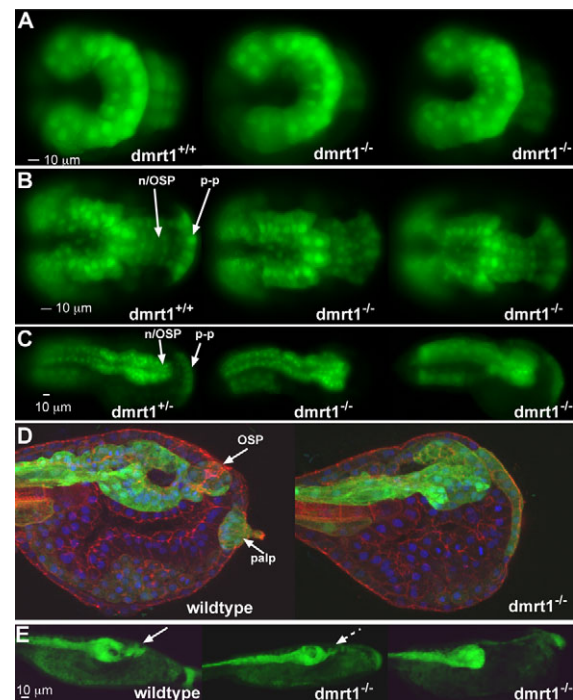

**Fig. 3. Brain and palp defects in *dmrt1* mutants. (A–E)** Central nervous system development at gastrula (A), neurula (B), early tailbud (C), late tailbud (D) and larval (E) stages. The genotypes of the embryos/larvae are indicated. n/OSP, neurohypophysis/OSP primordium; p-p, palp primordium.

(right larva). In *dmrt1*<sup>−/−</sup> embryos analyzed by confocal microscopy, small anterior protrusions of the brain corresponding to incomplete OSP and neurohypophyses were observed in eight of 30 larvae examined.

The lack of a detectable defect in *etr1*-Venus expression before the tailbud stage in the *C. savignyi dmrt1*<sup>−/−</sup> mutant (Fig. 3C) appears to differ from results in *C. intestinalis* in which MO knockdown of *dmrt1* resulted in a significant decrease in *foxC* expression at gastrula stage (Imai et al., 2006). Although this difference may simply reflect the different genes examined, it may also indicate a species difference. In order to compare the two species directly, we performed a similar assay in *C. savignyi* in which *dmrt1* was knocked down with a MO (Fig. 1E). Total RNA was prepared from single early tailbud embryos and from pools of four late gastrula embryos that had been injected with either the *dmrt1*-MO or control-MO (Fig. 1E). A subset of embryos from each morpholino injection session were allowed to grow to larval stage to confirm the efficacy of the knockdown. The expression levels of four genes were examined: *otx*; *foxC*; *six3/6*; and *cytoplasmic actin* (loading control). The level of expression of the four genes at late gastrula stage in the control MO and *dmrt1* MO-injected embryos was indistinguishable (duplicate samples for the control-MO; and triplicate samples for the *dmrt1*-MO are shown; Fig. 4). However, by early tailbud stage the expression of *six3/6* was greatly reduced in single embryos assayed (a representative four are shown). There also appeared to be a small decrease in the expression of *otx* at this stage. *foxC* expression was assayed in a separate MO injection series and was found to be greatly reduced in three of the four single *dmrt1*-MO injected embryos shown. Because we were assaying single embryos at tailbud stage, the difference in the *dmrt1*-MO injected embryos probably reflects

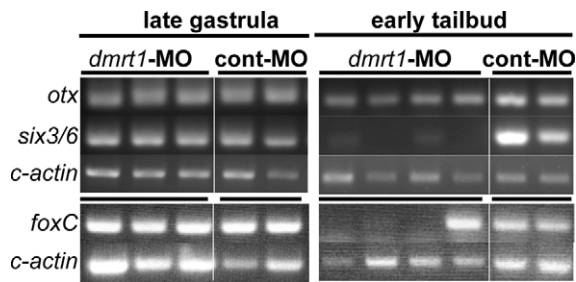

**Fig. 4. Disrupted gene expression by *dmrt1* knockdown.** The expression of the genes *otx*, *six3/6*, *c-actin* and *foxC* were assayed by RT-PCR in single embryos at early tailbud stage, and in pools of four embryos at late gastrula stage. Embryos were injected at the one-cell stage with either a *dmrt1*-MO or a control-MO (cont-MO). All samples included a no-reverse transcriptase control, which showed no amplification product (data not shown).

embryo-to-embryo differences in success of microinjection. These RT-PCR results are consistent with the *etr1*-Venus results at gastrula and neurula stages (Fig. 3), and with our results for *six3/6* expression in tailbud stage embryos by in situ hybridization, and suggest that *dmrt1* is not essential for the initial expression of the genes assayed here, but rather for their continued expression.

#### palp defects in *dmrt1*<sup>-/-</sup> mutants

Wild-type *Ciona* larvae have three adhesive palps (two dorsal and one ventral) arranged in a triangular orientation on the anterior end of the larval trunk. They are composed of several distinct cell types derived from the anterior epidermis. Each of the three palps has two sensory neurons, each with a single dendrite extending anteriorly, as well as structural and secretory columnar cells (Fig. 5A). Homozygous *dmrt1*<sup>-/-</sup> larvae typically lack these cell types and appear to have a single layer of epidermal cells (Fig. 5B). Immunostaining with antibodies to synaptotagmin, a marker that is expressed in axons, show the palp neurons projecting to the brain in wild-type larvae (Fig. 5D). In *dmrt1*<sup>-/-</sup> larvae the palp neurons appear to be absent (Fig. 5E). However, axons projecting from the anterior epidermis were observed in all *dmrt1*<sup>-/-</sup> larvae examined (*n*=8), probably corresponding to projections from rostral trunk epidermal sensory neurons (Imai and Meinertzhagen, 2007b).

To further characterize the development of the palps, the expression of the gene *islet* was examined by in situ hybridization in tailbud-stage embryos. *Islet* is expressed in the palp precursor cells and the sensory vesicle, beginning at the early tailbud stage. Islet production in the anterior trunk consists of two dorsal spots and a horizontal row of ventral cells that later become refined to a single spot in the middle and later tailbud stages (Giuliano et al., 1998). This triangular staining pattern corresponds to the location of the differentiated palps in the larvae (Fig. 5F). A total of 18 embryos from a self-fertilized *dmrt1*<sup>+/-</sup> adult were analyzed by in situ hybridization and subsequently genotyped by PCR. Fourteen embryos were either *dmrt1*<sup>+/-</sup> or *dmrt1*<sup>+/+</sup>, and showed the wild-type *islet* expression pattern. Of the four *dmrt1*<sup>-/-</sup> embryos, three showed only two spots of Islet production, and one had no production (Fig. 3G,H; and data not shown).

#### sensory vesicle defect in *dmrt1*<sup>-/-</sup> mutants

In addition to causing disruptions in the development of the palps and OSP, loss of *dmrt1* also causes major disruption in the development of the sensory vesicle, which comprises the anterior

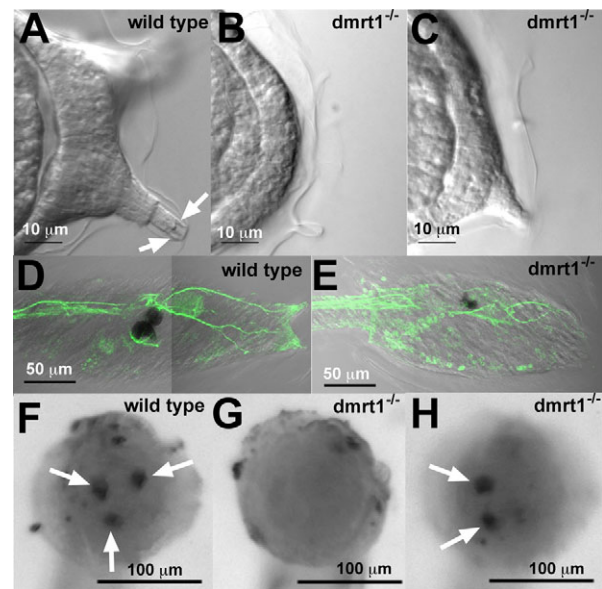

**Fig. 5. Palp defects in *dmrt1* mutants.** (A-C) Differential interference contrast images of the anterior end of wild-type (A) and *dmrt1*<sup>-/-</sup> larvae (B,C). Arrows in A indicate endings of palp neurons. (D,E) Wild-type (D) and *dmrt1*<sup>-/-</sup> (E) larvae stained with an antibody to synaptotagmin. (F-H) In situ hybridization for *islet1* in late tailbud embryos (F, wild type; G and H, *dmrt1*<sup>-/-</sup>). Arrows indicate specific hybridization to palp primordia.

brain and contains the photoreceptors (ocellus) and gravity-sensing organ (otolith). In 65% of *dmrt1*<sup>-/-</sup> larvae, the otolith was missing (*n*=200), and when present, it was not properly pigmented (87%), whereas lens cells were missing or disorganized in 37% of larvae (*n*=200). Antibodies against Arrestin (Arr), cellular retinaldehyde-binding protein (CRALBP) and opsin were used to visualize organization of the sensory vesicle in wild-type and *dmrt1*<sup>-/-</sup> larvae. In *Ciona* CRALBP is expressed broadly in the sensory vesicle and the neural tube, including the photoreceptors of the ocellus, whereas Arr is expressed exclusively in the photoreceptors. The cell bodies of the photoreceptors surround a single melanized cell on the right dorsolateral side in a hemispherical shape (Fig. 6A). Axons from these cells bundle posteriorly and then turn toward the midline near the posterior end of the sensory vesicle (arrow in Fig. 6A). Some *dmrt1*<sup>-/-</sup> larvae have well-organized photoreceptors on the right side of the sensory vesicle, but the entire group is often shifted anteriorly, giving the sensory vesicle an abnormal shape (Fig. 6B). More often, the photoreceptors are disorganized, often located throughout the sensory vesicle, and often decreased in number (Fig. 6C). In all *dmrt1*<sup>-/-</sup> larvae examined, axonal projections from the photoreceptors to the sensory vesicle were absent.

Opsin-1 is produced in the outer segments of the photoreceptor cells. In wild-type larvae, there are three types of the photoreceptors: the group I photoreceptor cells are found within a cavity made by the pigmented ocellus cell; the group II photoreceptor cells are located outside the pigment cavity; and the group III photoreceptor cells are located near the otolith on the left ventral side of the brain vesicle (arrows Fig. 6D) (Horie et al., 2008). Photoreceptors in *dmrt1*<sup>-/-</sup> larvae do produce opsin-1, indicating they are properly differentiated, but there are fewer outer segments and their arrangement in the sensory vesicle is abnormal



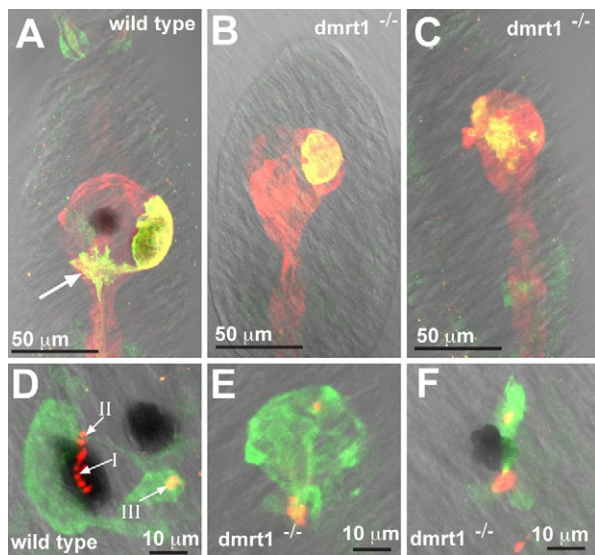

**Fig. 6. Brain defects in *dmrt1* mutants.** (A–C) Immunostained larvae for CRALBP (red) and Arrestin (yellow). (D–F) Immunostained larvae for Arrestin (green) and opsin-1 (red and yellow). Arrows in D indicate group I, II and III photoreceptors (Horie et al., 2008). The genotypes of all embryos are indicated.

(Fig. 6E,F). Fig. S1 in the supplementary material shows opsin and arrestin staining for 14 *dmrt1*<sup>−/−</sup> larvae. Unlike the more anterior palps and OSP, we found no cases in which there was a complete absence of photoreceptor cells, although the number and pattern was highly variable.

## DISCUSSION

Loss of *dmrt1* function in *C. savignyi* results in profound disruptions in the development of the sensory vesicle, OSP and palps, all of which are derivatives of the anterior neural plate (Lemaire et al., 2002). The *dmrt1* mutant line reported here, which is almost certainly a null based on presence of the premature stop codon early in the reading frame and the absence of detectable mutant transcript, allows for the characterization of the phenotype with a level of certainty that is not possible with MO knockdown. This is particularly important in cases such as observed here in which the phenotype is variable, and the timecourse of observed developmental defects does not correspond precisely to the timecourse of expression. We observed an apparent anterior to posterior difference in the degree of severity of the phenotype in which the most anterior of the affected organs, the palps, were in most cases completely absent. In those cases where palps could be identified, they were small and malformed. By contrast, the sensory organs and cells of the brain, including the photoreceptor and pigment cells, although malformed and reduced in number were always present.

It has been proposed that *dmrt1* may function in parallel with *otx* (Imai et al., 2006), which may account for the late onset and variability of the phenotype. Overlapping activity from the other *Ciona dmrt* gene, *dmrt2*, is unlikely because it does not appear to be expressed during embryogenesis. Whereas ascidians have two *dmrt* genes, vertebrates have eight. Perhaps not surprisingly, the hermaphroditic ascidians do not appear to have a close ortholog of the vertebrate *dmrt1*, which is most strongly implicated in sex determination. Phylogenetic analysis indicates

that *Ciona dmrt1* is the probable ortholog of vertebrate *dmrt4* and *dmrt5* (see Fig. S2 in the supplementary material). Interestingly, both vertebrate *dmrt4* and *dmrt5* are expressed in the brain and placodes, and MO knockdown of *Xenopus dmrt4*, which is expressed in the telencephalon and the olfactory placode, results in very specific defects in the olfactory placode (Huang et al., 2005). The relatively limited phenotype of *dmrt4* knockdown in *Xenopus* compared with the ascidian phenotype described here may reflect the duplication and subfunctionalization of the *dmrts* following the split of the vertebrates and the tunicates.

Finally, *dmrt1*<sup>−/−</sup> larvae often lose the left-right asymmetry in the sensory vesicle. In wild-type larvae this asymmetry is most obvious in the two pigmented cells. These cells are specified to become pigmented at the 110-cell stage, but remain equivalent in their ability to differentiate into either the otolith or ocellus until after neural tube closure (Nishida and Satoh, 1989). During closure the cells are stochastic in their alignment along the anteroposterior axis. The anterior cell becomes the otolith and the posterior cell becomes the ocellus through a Notch/Delta-mediated mechanism (Hudson et al., 2007). By the tailbud stage, the otolith is located at the midline on the ventral floor of the sensory vesicle, whereas the ocellus is positioned posterior to the otolith on the right. In *dmrt1*<sup>−/−</sup> embryos the photoreceptor cells are often shifted to the anterior wall of the sensory vesicle, and the otolith is often missing or fused to the ocellus pigment cell in various locations in the sensory vesicle. This suggests that, like the *terra* genes in zebrafish and chick, *dmrt1* has a role in establishing or maintaining left-right asymmetry. This function may be upstream or in conjunction with the Notch/Delta pathway. Future studies into the Notch/Delta and Nodal pathways (Hudson et al., 2007) in the *dmrt1*<sup>−/−</sup> mutant may reveal further insights into the patterning of the neural plate.

## Acknowledgements

We thank Dr Di Jiang for helping with the mutagenesis screen. This work was supported by grants from the NIH (HD38701 and GM075049) to W.C.S., and from the Japanese Space Agency to M.T. Deposited in PMC for release after 12 months.

## Competing interests statement

The authors declare no competing financial interests.

## Supplementary material

Supplementary material for this article is available at <http://dev.biologists.org/lookup/suppl/doi:10.1242/dev.045302/-/DC1>

## References

- Chiba, S., Jiang, D., Satoh, N. and Smith, W. C. (2009). Brachyury null mutant-induced defects in juvenile ascidian endodermal organs. *Development* **136**, 35–39.
- Giuliano, P., Marino, R., Pinto, M. R. and De Santis, R. (1998). Identification and developmental expression of Ci-is1, a homologue of vertebrate islet genes, in the ascidian *Ciona intestinalis*. *Mech. Dev.* **78**, 199–202.
- Hendrickson, C., Christaen, L., Deschet, K., Jiang, D., Joly, J. S., Legendre, L., Nakatani, Y., Tresser, J. and Smith, W. C. (2004). Culture of adult ascidians and ascidian genetics. *Methods Cell Biol.* **74**, 143–170.
- Hill, M. M., Broman, K. W., Stupka, E., Smith, W. C., Jiang, D. and Sidow, A. (2008). The *C. savignyi* genetic map and its integration with the reference sequence facilitates insights into chordate genome evolution. *Genome Res.* **18**, 1369–1379.
- Hong, C., Park, B. and Saint-Jeannet, J. (2007). The function of Dmrt genes in vertebrate development: it is not just about sex. *Dev. Biol.* **310**, 1–9.
- Horie, T., Sakurai, D., Ohtsuki, H., Terakita, A., Shichida, Y., Usukura, J., Kusakabe, T. and Tsuda, M. (2008). Pigmented and nonpigmented ocelli in the brain vesicle of the ascidian larva. *J. Comp. Neurol.* **509**, 88–102.
- Hotta, K., Mitsuhashi, K., Takahashi, H., Inaba, K., Oka, K., Gojobori, T. and Ikeo, K. (2007). A web-based interactive developmental table for the ascidian *Ciona intestinalis*, including 3D real-image embryo reconstructions: I. From fertilized egg to hatching larva. *Dev. Dyn.* **236**, 1790–1805.

- Huang, X., Hong, C. S., O'Donnell, M. and Saint-Jeannet, J. P. (2005). The doublesex-related gene, *XDmrt4*, is required for neurogenesis in the olfactory system. *Proc. Natl. Acad. Sci. USA* **102**, 11349-11354.
- Hudson, C. and Lemaire, P. (2001). Induction of anterior neural fates in the ascidian *Ciona intestinalis*. *Mech. Dev.* **100**, 189-203.
- Hudson, C., Lotito, S. and Yasuo, H. (2007). Sequential and combinatorial inputs from Nodal, Delta2/Notch and FGF/MEK/ERK signalling pathways establish a grid-like organisation of distinct cell identities in the ascidian neural plate. *Development* **134**, 3527-3537.
- Imai, J. H. and Meinertzhagen, I. A. (2007a). Neurons of the ascidian larval nervous system in *Ciona intestinalis*: I. Central nervous system. *J. Comp. Neurol.* **501**, 316-334.
- Imai, J. H. and Meinertzhagen, I. A. (2007b). Neurons of the ascidian larval nervous system in *Ciona intestinalis*: II. Peripheral nervous system. *J. Comp. Neurol.* **501**, 335-352.
- Imai, K. S., Hino, K., Yagi, K., Satoh, N. and Satou, Y. (2004). Gene expression profiles of transcription factors and signaling molecules in the ascidian embryo: towards a comprehensive understanding of gene networks. *Development* **131**, 4047-4058.
- Imai, K. S., Levine, M., Satoh, N. and Satou, Y. (2006). Regulatory blueprint for a chordate embryo. *Science* **312**, 1183-1187.
- Jiang, D., Munro, E. M. and Smith, W. C. (2005a). Ascidian prickle regulates both mediolateral and anterior-posterior cell polarity of notochord cells. *Curr. Biol.* **15**, 79-85.
- Jiang, D., Tresser, J. W., Horie, T., Tsuda, M. and Smith, W. C. (2005b). Pigmentation in the sensory organs of the ascidian larva is essential for normal behavior. *J. Exp. Biol.* **208**, 433-438.
- Kim, G. J. and Nishida, H. (2001). Role of the FGF and MEK signaling pathway in the ascidian embryo. *Dev. Growth Differ.* **43**, 521-533.
- Lemaire, P., Bertrand, V. and Hudson, C. (2002). Early steps in the formation of neural tissue in ascidian embryos. *Dev. Biol.* **252**, 151-169.
- Manni, L., Agnoletto, A., Zaniolo, G. and Burighel, P. (2005). Stomodaeal and neurohypophysial placodes in *Ciona intestinalis*: insights into the origin of the pituitary gland. *J. Exp. Zool. B Mol. Dev. Evol.* **304**, 324-339.
- Meinertzhagen, I. A., Lemaire, P. and Okamura, Y. (2004). The neurobiology of the ascidian tadpole larva: recent developments in an ancient chordate. *Annu. Rev. Neurosci.* **27**, 453-485.
- Meng, A., Morre, B., Tang, H., Yuan, B. and Lin, S. (1999). A Drosophila doublesex-related gene, *terra*, is involved in somitogenesis in vertebrates. *Development* **126**, 1259-1268.
- Moody, R., Davis, S. W., Cubas, F. and Smith, W. C. (1999). Isolation of developmental mutants of the ascidian *Ciona savignyi*. *Mol. Gen. Genet.* **262**, 199-206.
- Nishida, H. (1987). Cell lineage analysis in ascidian embryos by intracellular injection of a tracer enzyme. III. Up to the tissue restricted stage. *Dev. Biol.* **121**, 526-541.
- Nishida, H. and Satoh, N. (1989). Determination and regulation in the pigment cell lineage of the ascidian embryo. *Dev. Biol.* **132**, 355-367.
- Raya, A. and Izpisua Belmonte, J. C. (2006). Left-right asymmetry in the vertebrate embryo; from early information to higher-level integration. *Nat. Rev. Genet.* **7**, 283-293.
- Sakurai, D., Goda, M., Kohmura, Y., Horie, T., Iwamoto, H., Ohtsuki, H. and Tsuda, M. (2004). The role of pigment cells in the brain of ascidian larva. *J. Comp. Neurol.* **475**, 70-82.
- Satoh, N. (1994). *Developmental Biology of Ascidians*. Cambridge: Cambridge University Press.
- Satou, Y., Kusakabe, T., Araki, S. and Satoh, N. (1995). Timing of initiation of muscle-specific gene expression in the ascidian embryo precedes that of developmental fate restriction in lineage cells. *Dev. Growth Differ.* **37**, 319-327.
- Takimoto, N., Kusakabe, T., Horie, T., Miyamoto, Y. and Tsuda, M. (2006). Origin of the vertebrate visual cycle: III. Distinct distribution of RPE65 and beta-carotene 15,15'-monooxygenase homologues in *Ciona intestinalis*. *Photochem. Photobiol.* **82**, 1468-1474.
- Tsuda, M., Kusakabe, T., Iwamoto, H., Horie, T., Nakashima, Y., Nakagawa, M. and Okunou, K. (2003). Origin of the vertebrate visual cycle: II. Visual cycle proteins are localized in whole brain including photoreceptor cells of a primitive chordate. *Vision Res.* **43**, 3045-3053.
- Veeman, M. T., Nakatani, Y., Hendrickson, C., Ericson, V., Lin, C. and Smith, W. C. (2008). Chongmague reveals an essential role for laminin-mediated boundary formation in chordate convergence and extension movements. *Development* **135**, 33-41.
- Veeman, M. T., Newman-Smith, E., El-Nachef, D. and Smith, W. C. (2010). The ascidian mouth opening is derived from the anterior neuropore: Reassessing the mouth/neural tube relationship in chordate evolution. *Dev. Biol.* in press.
- Wada, S. and Saiga, H. (1999). Vegetal cell fate specification and anterior neuroectoderm formation by *Hroth*, the ascidian homologue of orthodenticle/*otx*. *Mech. Dev.* **82**, 67-77.
- Yagi, K. and Makabe, K. W. (2001). Isolation of an early neural marker gene abundantly expressed in the nervous system of the ascidian, *Halocynthia roretzi*. *Dev. Genes Evol.* **211**, 49-53.
- Yamada, L., Shoguchi, E., Wada, S., Kobayashi, K., Mochizuki, Y., Satou, Y. and Satoh, N. (2003). Morpholino-based gene knockdown screen of novel genes with developmental function in *Ciona intestinalis*. *Development* **130**, 6485-6495.
